# Supplementary material for: A Case of Human Hepatic Alveolar Echinococcosis Accompanied by Lung and Brain Metastases
Source: PubMed Central journal article supplement — Korean J Parasitol. 2021 Jun 30;59(3):291–6. doi: 10.3347/kjp.2021.59.3.291 (PMC8255489; doi:10.3347/kjp.2021.59.3.291), 2021-06-30
Supplement: kjp-59-3-291-suppl.pdf [file kjp-59-3-291-suppl.pdf]

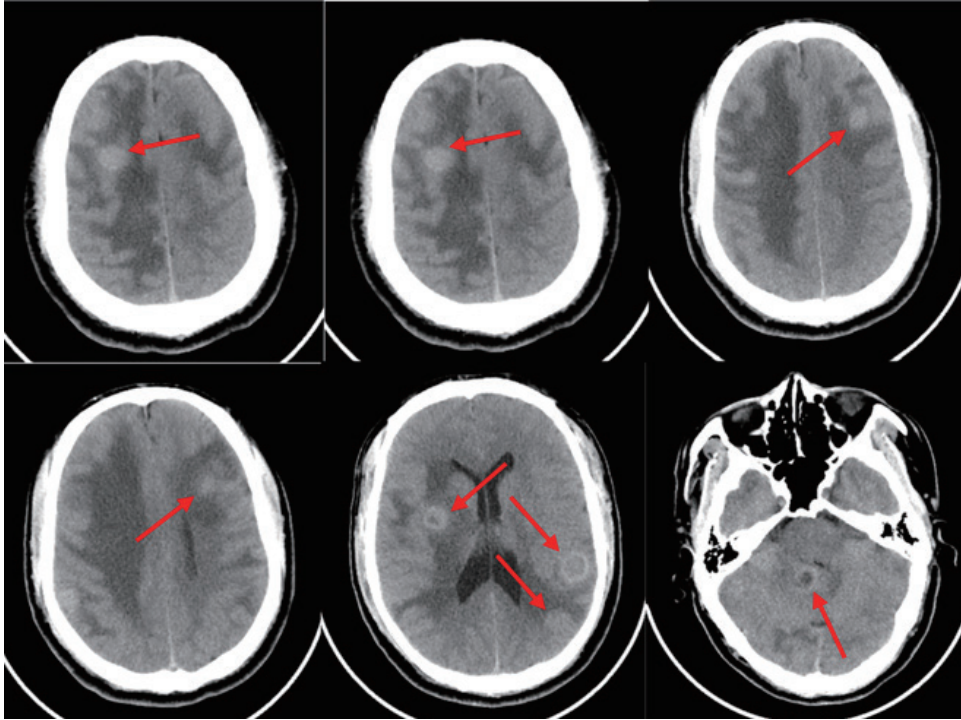

**Supplementary Fig. S1.** Head CT examination. Multiple space-occupying lesions with edema in brain parenchyma (red arrows).
